# Supplementary material
Source: Springer Nature journal article supplement (https://www.springermedizin.de/resource/supplementary/12885_2011_2810_MOESM2_ESM.pdf/9462056)

I

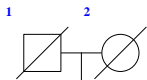

II

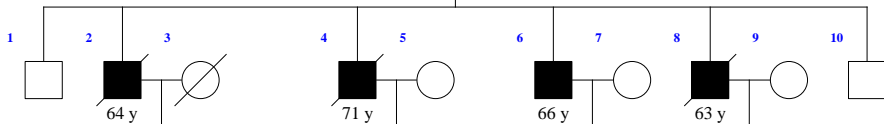

III

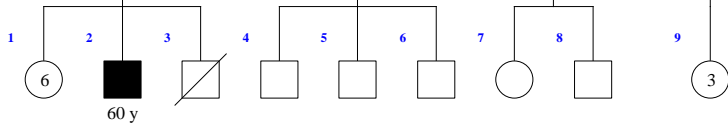

Supplement: MOESM2 [file 9462056]
